# Supplementary material for: Differential protection by anthocyanin-rich bilberry extract and resveratrol against lipid micelle-induced oxidative stress and monolayer permeability in Caco-2 intestinal epithelial cells
Source: Royal Society of Chemistry journal article supplement (doi:10.1039/d0fo02377a), 2021-01-01
Supplement: d0fo02377a1.pdf [file d0fo02377a1.pdf]

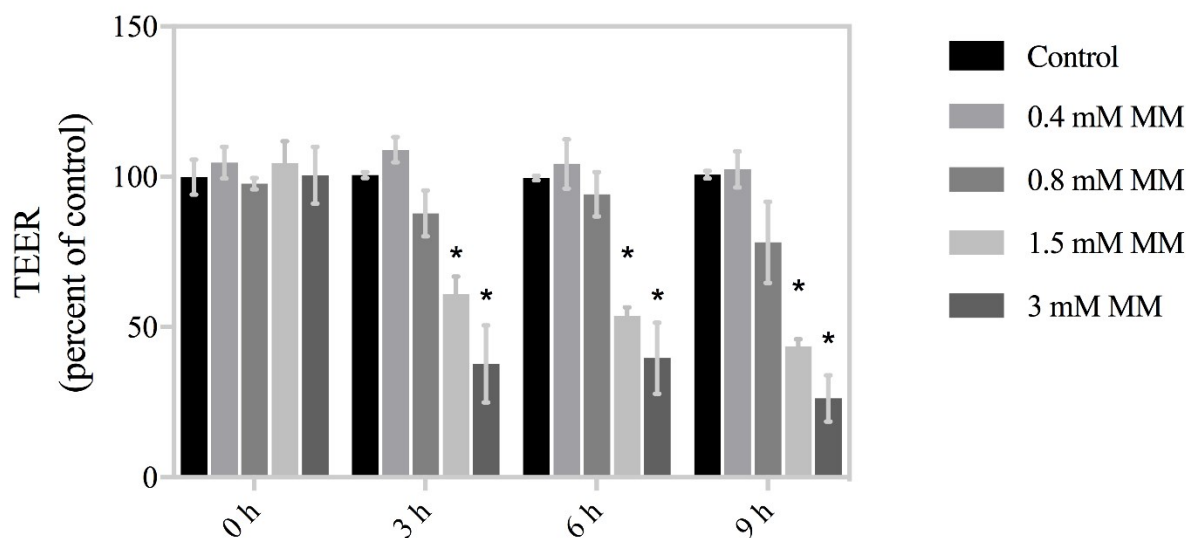

**Figure S1.** *Effects of doses of MM on transepithelial electrical resistance of a differentiated Caco-2 cell monolayer.* Caco-2 cells grown on a membrane for 21 days were treated with different doses of MM for 9 h. Measurements were done every 1.5 h after addition of MM. Bars represent means  $\pm$  SD of 2 independent experiments with 3 treatment wells in each experiment \* Significantly different from the respective Control ( $P < 0.05$ ). The significant difference between means was tested with one-way ANOVA followed by Tukey's multiple comparisons post hoc test.

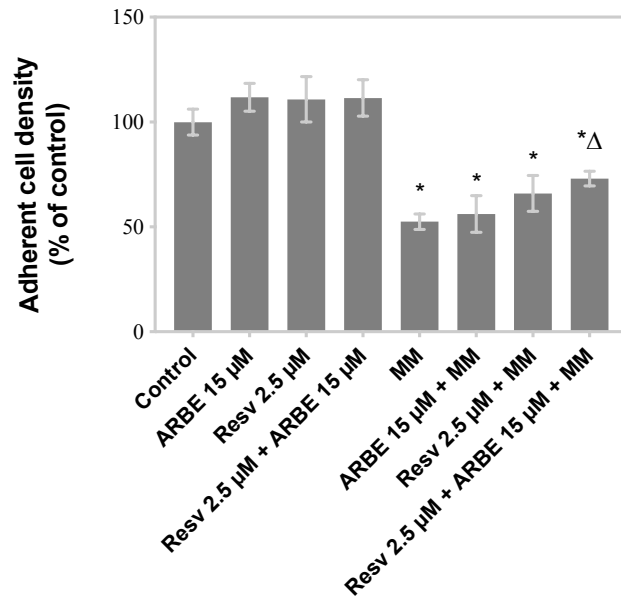

**Figure S2.** Effect of ARBE and resveratrol alone and in combination on protecting against MM-induced cytotoxicity. Caco-2 cells were treated with ARBE or resveratrol (Resv) for 2 or 5 h respectively alone or were initially treated with resveratrol for 3 h then another 2 h with ARBE, thus a total exposure of 5 h with resveratrol (Resv) and 2 h with ARBE followed by 24 h challenge with 0.4 mM MM. Adherent cell density after treatments with 15 µM ARBE or 2.5 µM resveratrol, alone or in combination, with and without MM exposure. Values are the means  $\pm$  SD (3 independent experiments with three wells of cells for each treatment). \* Significantly different from the control group ( $P < 0.05$ ).  $\Delta$  Significantly different from the MM group ( $P < 0.05$ ). The significant difference between groups was tested with two-way ANOVA followed by Tukey's multiple comparisons post hoc test.

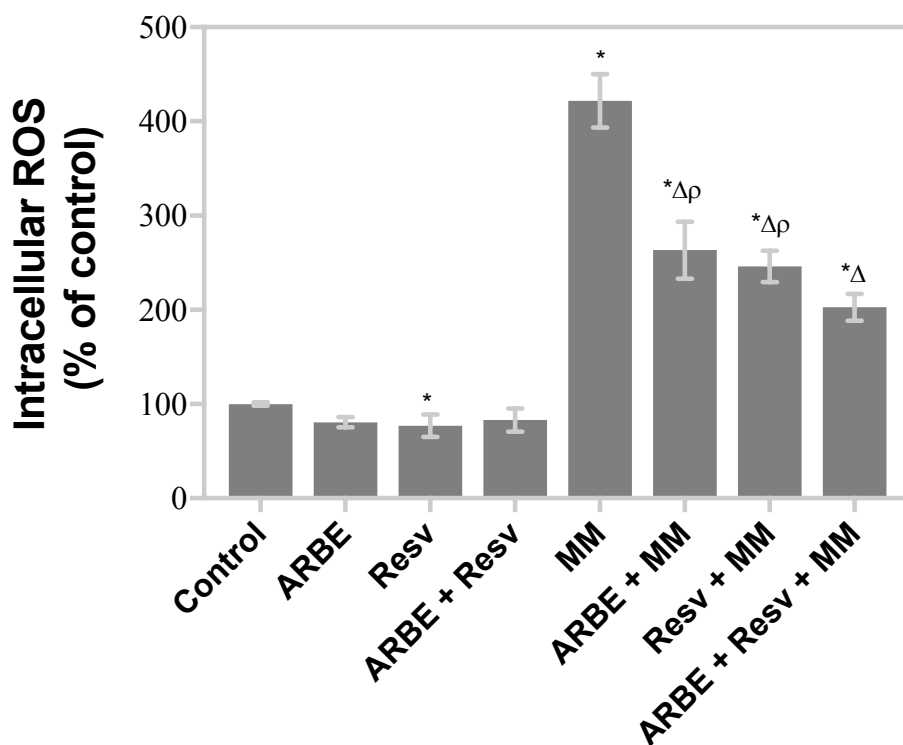

**Figure S3.** Effect of ARBE and resveratrol (0.1  $\mu$ M) alone and in combination and MM on intracellular ROS. Caco-2 cells were treated with ARBE or resveratrol (Resv) for 2 or 5 h respectively, prior to adding 0.4 mM MM and incubating for an additional 24 h. For the combination, resveratrol was added for 3 h then ARBE was added for another 2 h (at half concentration each to the total concentration indicated) before adding MM. After treatments, intracellular ROS generation was measured using DCFH-DA, and the SRB assay was conducted in the same wells to correct for differences in adherent cell density. \* Significantly different from the control group ( $P < 0.05$ ).  $\Delta$  Significantly different from the MM group ( $P < 0.05$ ).  $\rho$  Significantly different from the combination (ARBE + Resv + MM) group ( $P < 0.05$ ). The significant difference between groups in the experiments shown in A was tested with one-way ANOVA and in B and C with two-way ANOVA, followed by Tukey's multiple comparisons test.
